# Supplementary material for: Effect of Thiophene Insertion on X-Shaped Anthracene-Based Hole-Transporting Materials in Perovskite Solar Cells
Source: MDPI journal article supplement (doi:10.3390/polym14081580), 2022-04-13
Supplement: s1 [file s1]

Supplementary

# Effect of Thiophene Insertion on X-Shaped Anthracene-Based Hole-Transporting Materials in Perovskite Solar Cells

Dharuman Chandrasekaran <sup>1</sup>, Wei Hao Chiu <sup>2</sup>, Kun Mu Lee <sup>2,3,4,5,\*</sup>, Jian Ming Liao <sup>6</sup>, Hsien Hsin Chou <sup>6,\*</sup> and Yung Sheng Yen <sup>1,\*</sup>

<sup>1</sup> Department of Chemistry, Chung Yuan Christian University, 320 Zhongli, Taoyuan, Taiwan; chandrugood91@gmail.com

<sup>2</sup> Center for Reliability Sciences and Technologies, Chang Gung University, 333 Guishan, Taoyuan, Taiwan; weihao.chiu@gmail.com

<sup>3</sup> Department of Chemical and Materials Engineering, Chang Gung University, 333 Guishan, Taoyuan, Taiwan

<sup>4</sup> Center for Green Technology, Chang Gung University, 333 Guishan, Taoyuan, Taiwan

<sup>5</sup> Division of Neonatology, Department of Pediatrics, Chang Gung Memorial Hospital, 33305 Linkou, Taoyuan, Taiwan

<sup>6</sup> Department of Applied Chemistry, Providence University, 433 Taichung, Taiwan; jl387555@gmail.com

\* Correspondence: kmlee@mail.cgu.edu.tw (K.M.L.); hhchou@pu.edu.tw (H.H.C.); ysyen@cycu.edu.tw (Y.S.Y.)

## Figures and tables

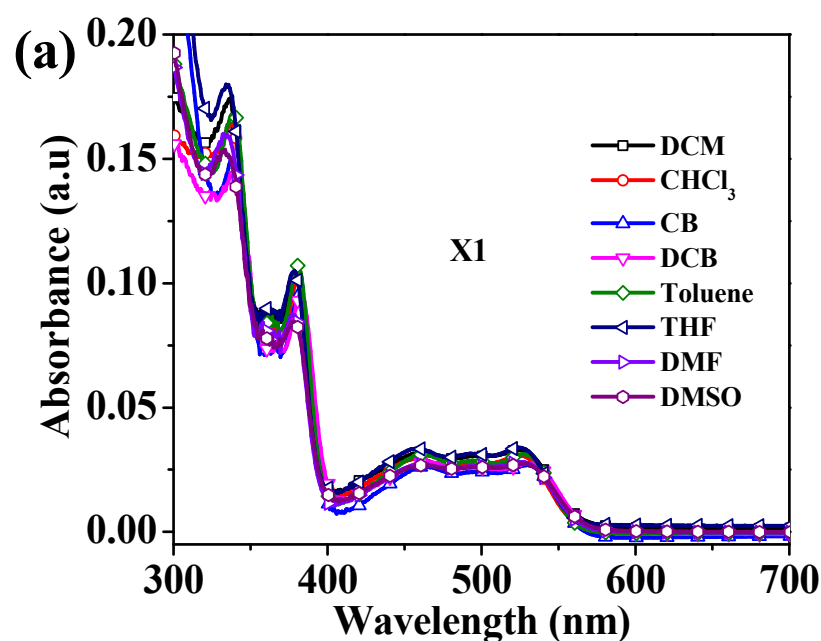

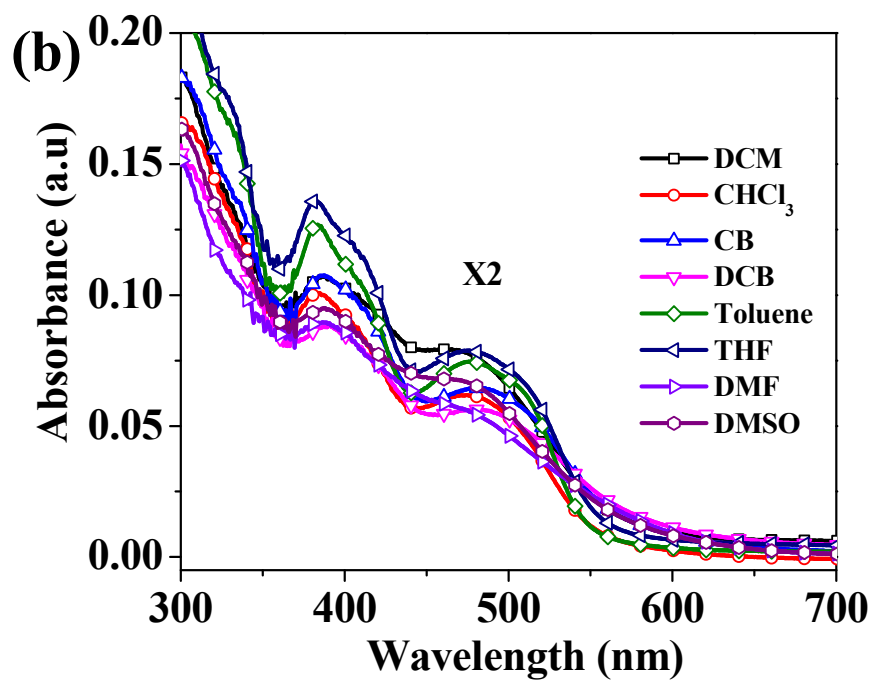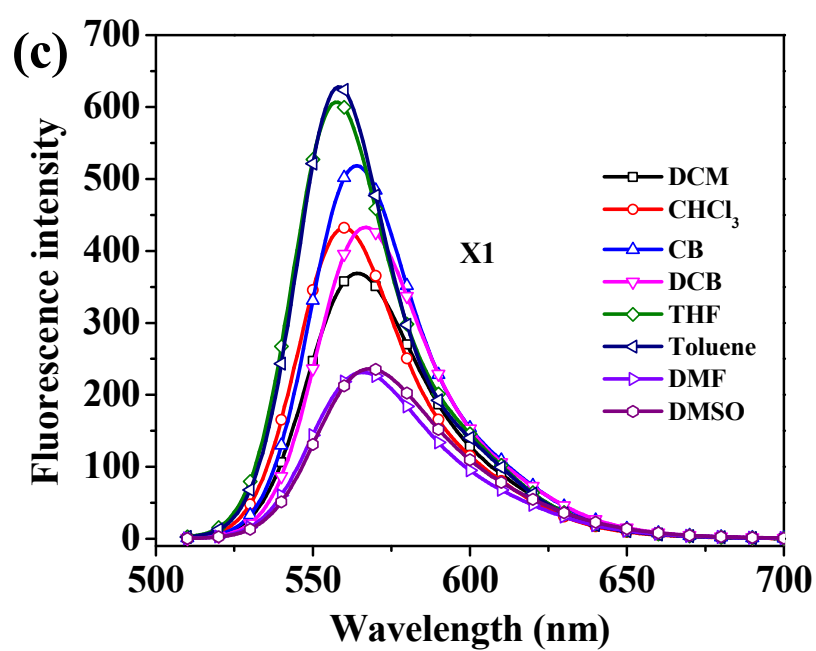

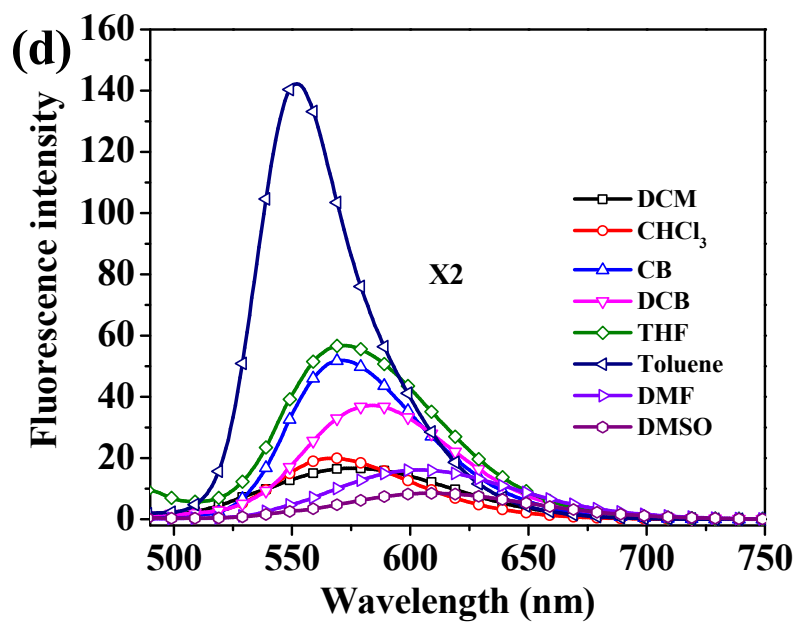

Figure S1. (a), (b) Absorption spectra of X1, X2 (c), (d) Emission spectra of X1, X2 recorded in different solvents.

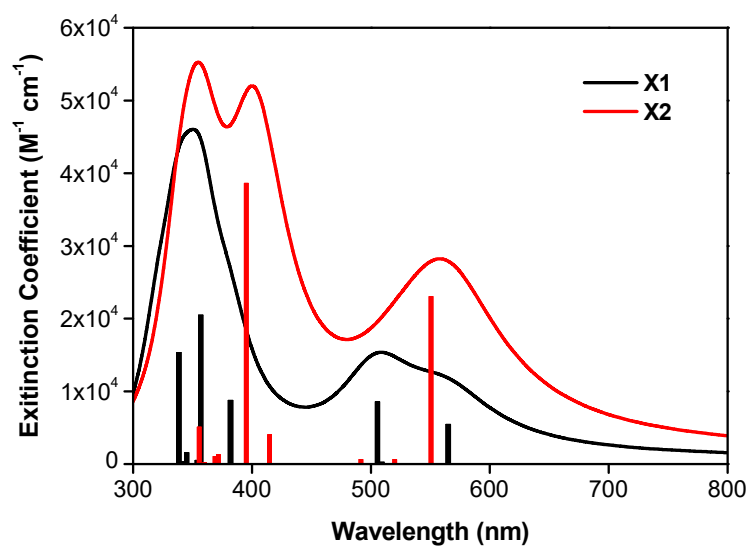

Figure S2. Simulated UV-vis absorption spectra for X1 and X2 based on TDDFT results.

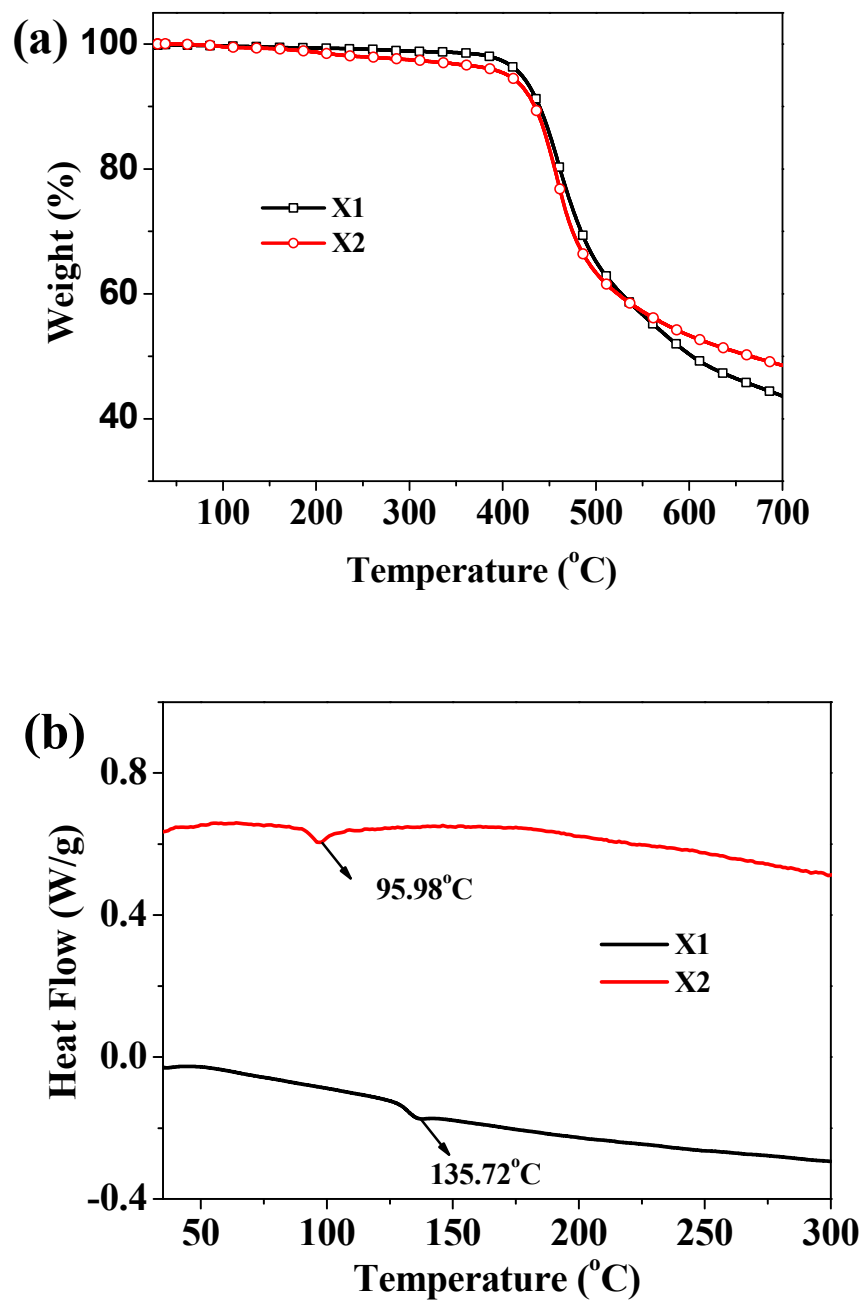

**Figure S3.** (a) Thermogravimetric analysis of X1, X2 at a scan rate of 10  $^{\circ}\text{C min}^{-1}$  under  $\text{N}_2$  atmosphere. (b) Differential scanning calorimetry of X1, X2 under nitrogen at a heating rate of 20  $^{\circ}\text{C min}^{-1}$ .

| HTMs                                                                                                | Top view                                                                            | Side view                                                                            |
|-----------------------------------------------------------------------------------------------------|-------------------------------------------------------------------------------------|--------------------------------------------------------------------------------------|
| 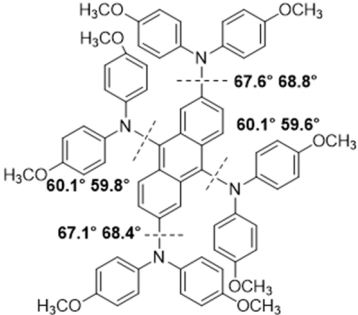 <p><b>X1</b></p>  |   |   |
|  <p><b>X2</b></p> |  |  |

**Figure S4.** Calculated molecular geometries and dihedral angles between adjacent groups for **X1** and **X2**.

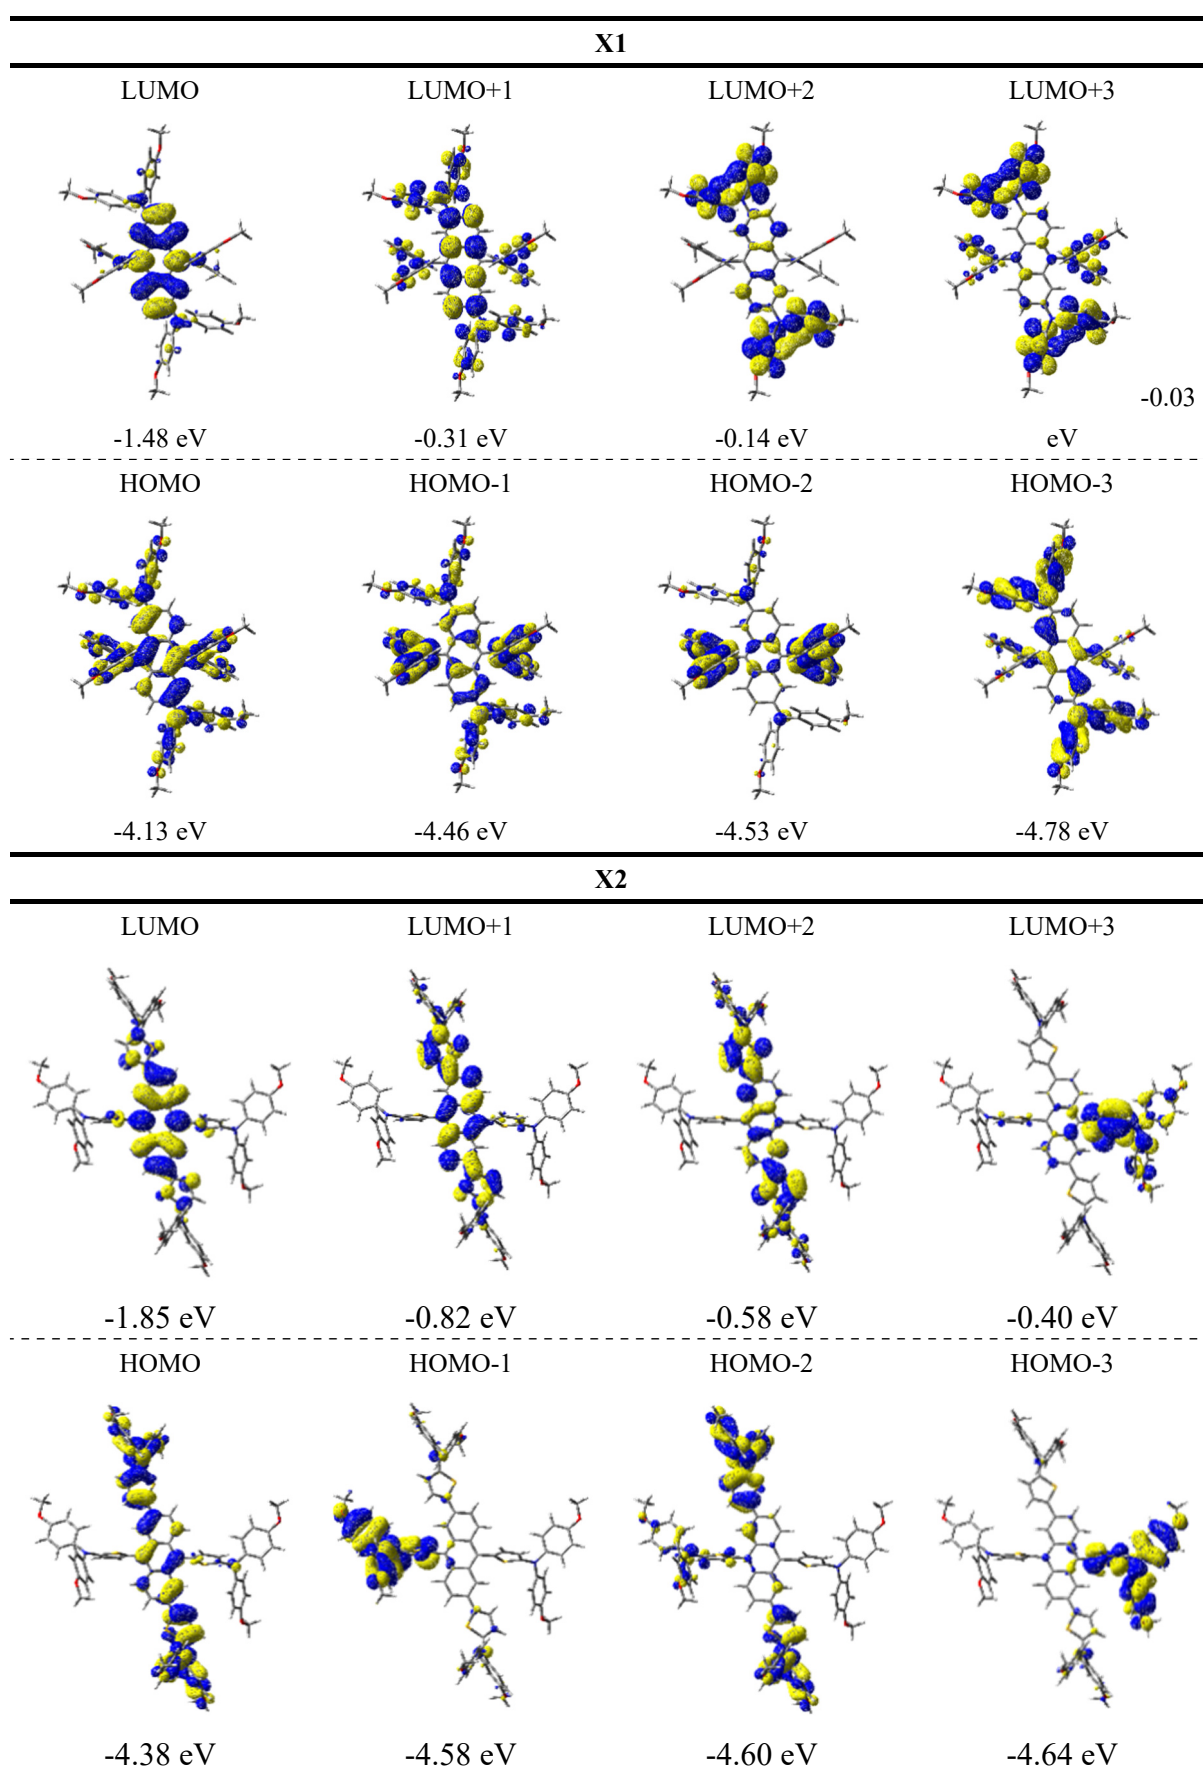

Figure S5. Frontier molecular orbitals for ground-state optimized X1 and X2.

**Table S1.** Calculated TDDFT results at B3LYP/6-31G\* level showing excitation energies ( $E_{\text{cal}}$ ), oscillator strengths ( $f$ ) and components for each vertical excitations.

| State     | $E_{\text{cal}}$ , eV | $f$  | Components |           | State     | $E_{\text{cal}}$ , eV | $f$  | Components |           |
|-----------|-----------------------|------|------------|-----------|-----------|-----------------------|------|------------|-----------|
| <b>X1</b> | S1                    | 2.19 | 0.137      | H1→L 4%   | <b>X2</b> | S1                    | 2.25 | 0.576      | H→L 49%   |
|           |                       |      |            | H→L 45%   |           | S2                    | 2.28 | 0.002      | H1→L 49%  |
|           | S2                    | 2.43 | 0.007      | H2→L 46%  |           | S3                    | 2.38 | 0.016      | H2→L 49%  |
|           |                       |      |            | H1→L 3%   |           |                       |      |            |           |
|           | S3                    | 2.45 | 0.214      | H2→L 3%   |           | S4                    | 2.52 | 0.016      | H3→L 49%  |
|           |                       |      |            | H1→L 42%  |           | S5                    | 2.99 | 0.101      | H4→L 41%  |
|           | S4                    | 2.85 | 0.001      | H3→L 49%  |           |                       |      |            | H→L1 7%   |
|           | S5                    | 3.25 | 0.219      | H9→L 1%   |           | S6                    | 3.14 | 0.965      | H5→L 1%   |
|           |                       |      |            | H4→L 11%  |           |                       |      |            | H4→L 7%   |
|           | S6                    | 3.47 | 0.513      | H→L1 35%  |           |                       |      |            | H3→L1 2%  |
|           |                       |      |            | H4→L 33%  |           |                       |      |            | H3→L2 2%  |
|           |                       |      |            | H1→L1 4%  |           |                       |      |            | H→L1 35%  |
|           |                       |      |            | H→L1 10%  |           |                       |      |            | H→L2 1%   |
|           | S7                    | 3.50 | 0.014      | H→L2 46%  |           | S7                    | 3.33 | 0.032      | H3→L1 3%  |
|           |                       |      |            |           |           |                       |      |            | H1→L1 34% |
|           | S8                    | 3.59 | 0.040      | H3→L2 2%  |           |                       |      |            | H→L2 11%  |
|           |                       |      |            | H2→L2 1%  |           | S8                    | 3.36 | 0.026      | H3→L1 7%  |
|           |                       |      |            | H1→L1 15% |           |                       |      |            | H1→L1 16% |
|           |                       |      |            | H→L3 29%  |           |                       |      |            | H→L2 24%  |
|           | S9                    | 3.63 | 0.009      | H2→L1 19% |           | S9                    | 3.44 | 0.005      | H2→L1 47% |
|           |                       |      |            | H1→L1 1%  |           |                       |      |            |           |
|           |                       |      |            | H1→L4 1%  |           |                       |      |            |           |
|           |                       |      |            | H→L4 26%  |           |                       |      |            |           |
|           | S10                   | 3.66 | 0.383      | H4→L 3%   |           | S10                   | 3.49 | 0.127      | H5→L 2%   |
|           |                       |      |            | H1→L1 28% |           |                       |      |            | H3→L1 33% |
|           |                       |      |            | H→L3 14%  |           |                       |      |            | H3→L2 1%  |
|           |                       |      |            | H→L4 1%   |           |                       |      |            | H→L1 2%   |
|           |                       |      |            |           |           |                       |      |            | H→L2 9%   |

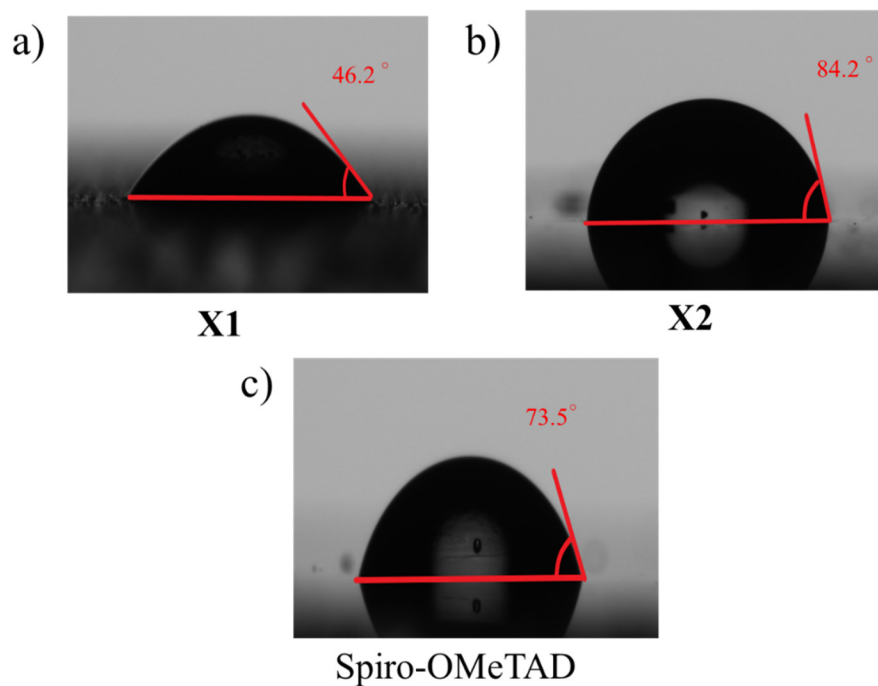

**Figure S6.** Contact angle between water and HTM film of (a) X1, (b) X2, and (c) spiro-OMeTAD on perovskite.

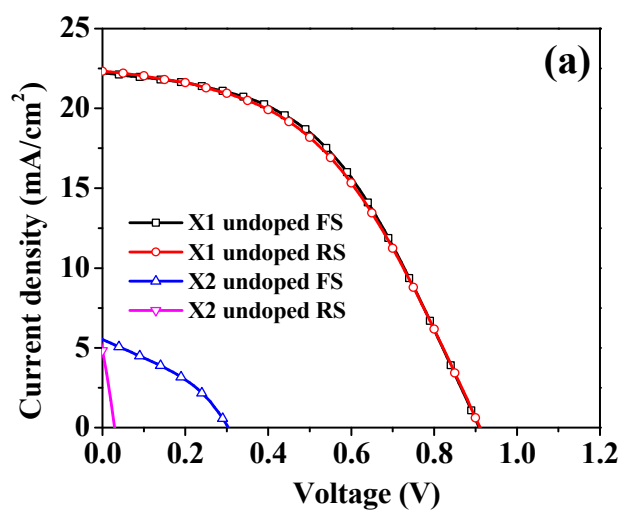

**Figure S7.**  $J$ - $V$  curves of PSCs undoped X1, X2 under forward and reverse scan measured under AM 1.5G illuminations in ambient atmosphere at a constant rate  $100 \text{ mV s}^{-1}$ .



**Table S2.** Device stability parameters of perovskite solar cells based on the X1, X2, Spiro-OMeTAD HTMs.

| HTM                |       | direction | $V_{oc}$<br>(V) | $J_{sc}$<br>(mA/cm <sup>2</sup> ) | $FF$   | PCE<br>(%) |
|--------------------|-------|-----------|-----------------|-----------------------------------|--------|------------|
| X1(8h)             | doped | FS        | 1.005           | 23.799                            | 65.269 | 15.511     |
|                    |       | RS        | 1.012           | 23.721                            | 67.543 | 16.104     |
| X1(12h)            | doped | FS        | 0.979           | 23.394                            | 64.828 | 14.758     |
|                    |       | RS        | 0.984           | 23.493                            | 64.087 | 14.715     |
| X1(96h)            | doped | FS        | 0.994           | 23.614                            | 64.370 | 15.039     |
|                    |       | RS        | 0.994           | 23.627                            | 64.987 | 15.177     |
| X1(204h)           | doped | FS        | 0.919           | 20.549                            | 66.208 | 12.500     |
|                    |       | RS        | 0.943           | 20.855                            | 67.961 | 13.855     |
| X1(300h)           | doped | FS        | 0.924           | 19.613                            | 66.411 | 12.016     |
|                    |       | RS        | 0.955           | 19.683                            | 68.326 | 12.820     |
| X2(8h)             | doped | FS        | 0.933           | 16.432                            | 52.763 | 8.08       |
|                    |       | RS        | 0.936           | 16.568                            | 66.165 | 10.25      |
| X2(12h)            | doped | FS        | 1.039           | 13.761                            | 67.675 | 9.665      |
|                    |       | RS        | 1.042           | 16.398                            | 50.597 | 8.583      |
| X2(96h)            | doped | FS        | 0.903           | 14.245                            | 55.472 | 7.112      |
|                    |       | RS        | 0.848           | 14.940                            | 59.031 | 7.470      |
| X2(204h)           | doped | FS        | 0.901           | 14.137                            | 55.410 | 7.005      |
|                    |       | RS        | 0.831           | 14.842                            | 58.320 | 7.126      |
| X2(300h)           | doped | FS        | 0.854           | 12.839                            | 41.506 | 4.551      |
|                    |       | RS        | 0.925           | 13.641                            | 47.925 | 6.048      |
| spiro-OMeTAD(0h)   | doped | FS        | 1.025           | 23.228                            | 74.281 | 17.589     |
|                    |       | RS        | 1.045           | 23.262                            | 75.219 | 18.171     |
| spiro-OMeTAD(8h)   | doped | FS        | 1.079           | 23.022                            | 73.056 | 18.031     |
|                    |       | RS        | 1.088           | 22.934                            | 75.012 | 18.587     |
| spiro-OMeTAD(12h)  | doped | FS        | 1.089           | 23.504                            | 71.814 | 18.318     |
|                    |       | RS        | 1.096           | 23.446                            | 71.239 | 18.248     |
| spiro-OMeTAD(96h)  | doped | FS        | 1.002           | 23.318                            | 70.325 | 16.340     |
|                    |       | RS        | 1.022           | 23.265                            | 71.967 | 17.025     |
| spiro-OMeTAD(300h) | doped | FS        | 0.971           | 23.145                            | 66.838 | 14.967     |
|                    |       | RS        | 0.999           | 23.028                            | 66.277 | 15.198     |

n-i-p device: ITO/SnO<sub>2</sub>/ CH<sub>3</sub>NH<sub>3</sub>PbI<sub>3</sub>/HTM/Au.

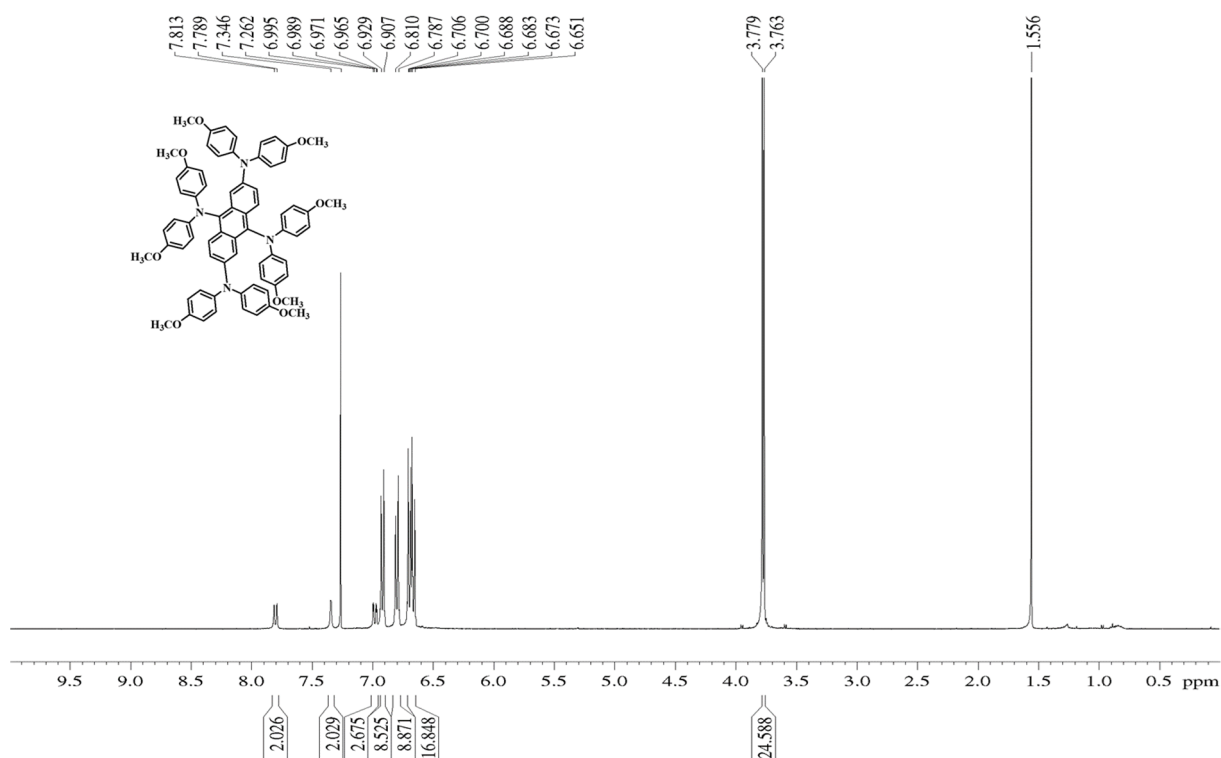

Figure S8. <sup>1</sup>H NMR spectrum of X1 in CDCl<sub>3</sub>.

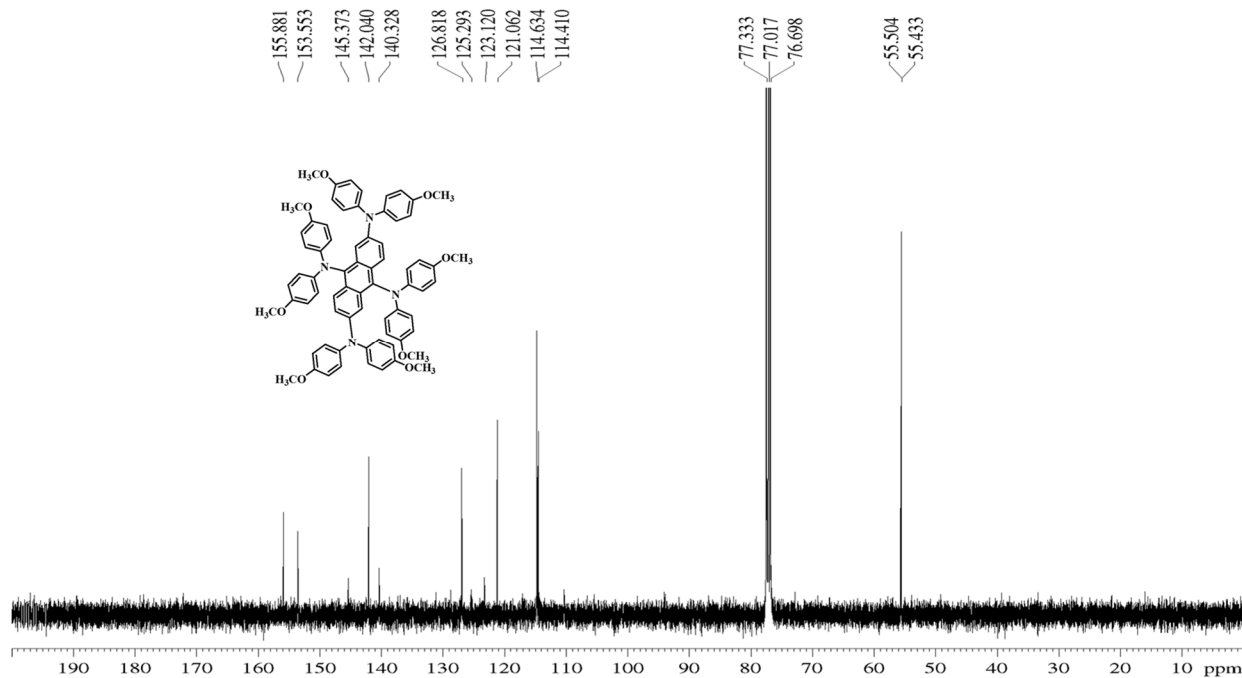

Figure S9. <sup>13</sup>C NMR spectrum of X1 in CDCl<sub>3</sub>.

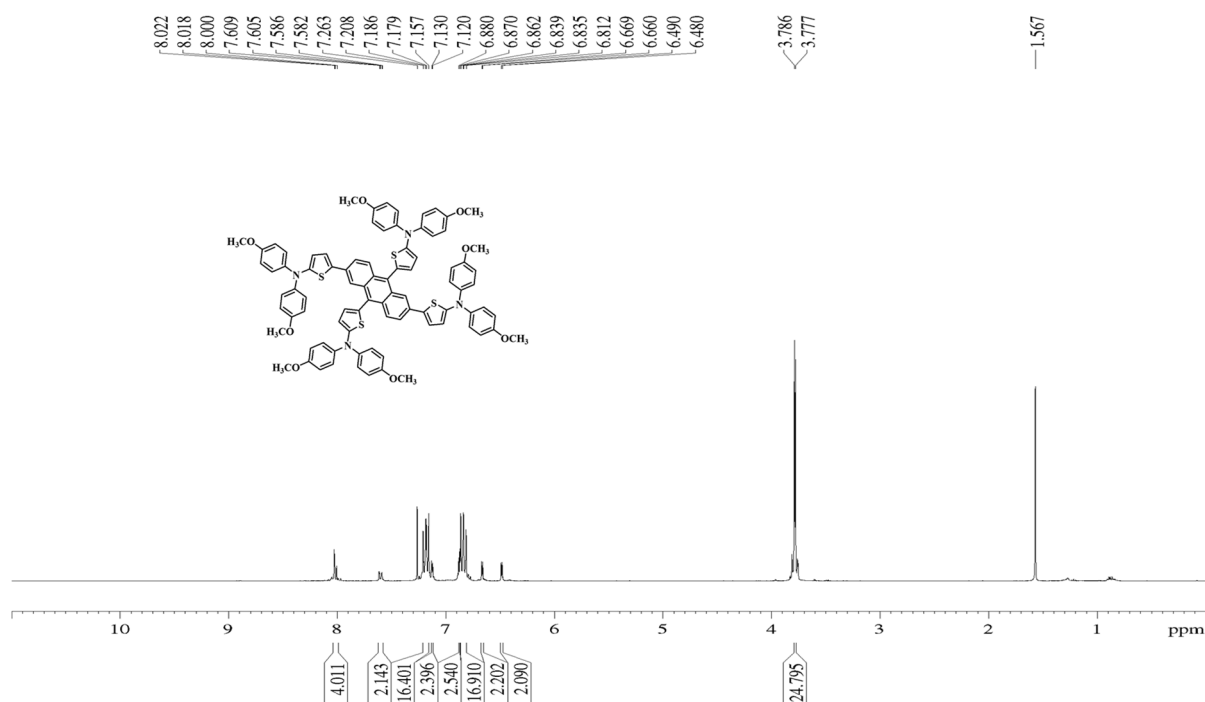Figure S10. <sup>1</sup>H NMR spectrum of X2 in CDCl<sub>3</sub>.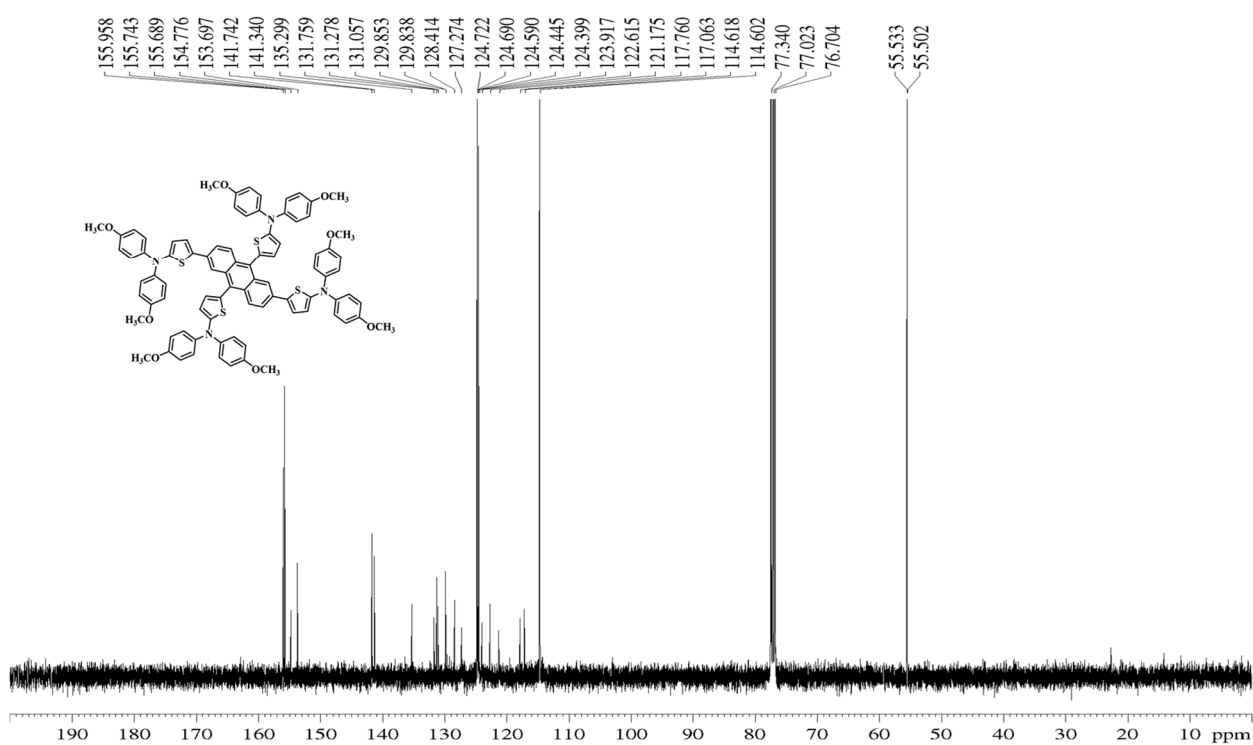Figure S11. <sup>13</sup>C NMR spectrum of X2 in CDCl<sub>3</sub>.
